# Supplementary material for: Preclinical Characterization of Antioxidant Quinolyl Nitrone QN23 as a New Candidate for the Treatment of Ischemic Stroke
Source: MDPI journal article supplement (doi:10.3390/antiox11061186), 2022-06-16
Supplement: s1 [file s1]

# Supplementary Material

## Preclinical Characterization of Antioxidant Quinolyl Nitrone QN23 as a New Candidate for the Treatment of Ischemic Stroke

Emma Martínez-Alonso <sup>1</sup>, Alejandro Escobar-Peso <sup>1</sup>, Alicia Aliena-Valero <sup>2</sup>, Germán Torregrosa <sup>2</sup>, Mourad Chioua <sup>3</sup>, Rocío Fernández-Serra <sup>4</sup>, Daniel González-Nieto <sup>4,5</sup>, Juan B. Salom <sup>2,6</sup>, Jaime Masjuan <sup>7,8</sup>, José Marco-Contelles <sup>3</sup> and Alberto Alcázar <sup>1,\*</sup>

<sup>1</sup> Department of Research, Hospital U. Ramón y Cajal, IRYCIS, Ctra. Colmenar km 9.1, Madrid 28034, Spain; emma.martinez@hrc.es (E.M.-A.); alejandro.escobar@hrc.es (A.E.-P.); alberto.alcazar@hrc.es (A.A.)

<sup>2</sup> Unidad Mixta de Investigación Cerebrovascular, Instituto de Investigación Sanitaria La Fe - Universidad de Valencia, Valencia 46016, Spain; alicia\_aliena@iislafe.es (A.A.-V.); torregrosa\_ger@gva.es (G.T.); salom\_jba@gva.es (J.B.S.)

<sup>3</sup> Laboratory of Medicinal Chemistry (IQOG, CSIC), C/Juan de la Cierva 3, Madrid 28006, Spain; m.chioua@csic.es (M.C.); jlmarco@iqog.csic.es (J.M.-C.)

<sup>4</sup> Center for Biomedical Technology, Universidad Politécnica de Madrid, Pozuelo de Alarcón 28223, Spain; rocio.fernandez@ctb.upm.es (R.F.-S.); daniel.gonzalez@ctb.upm.es (D.G.-N.)

<sup>5</sup> CIBER of Bioengineering Biomaterials and Nanomedicine (CIBER-BBN), Spain

<sup>6</sup> Departamento de Fisiología, Universidad de Valencia, Valencia 46016, Spain

<sup>7</sup> Department of Neurology, Hospital Universitario Ramón y Cajal, IRYCIS, Ctra. Colmenar km 9.1, Madrid 28034, Spain; jaime.masjuan@salud.madrid.org (J.M.)

<sup>8</sup> Department of Medicine, Facultad de Medicina, Universidad de Alcalá, Ctra. Madrid-Barcelona km 33.6, Alcalá de Henares 28871, Spain

### Contents

|                                                                           |    |
|---------------------------------------------------------------------------|----|
| A. Toxicokinetics study. Clinical biochemistry parameters (Table S1)..... | S2 |
|---------------------------------------------------------------------------|----|

## A. Toxicokinetics study. Clinical biochemistry parameters

Table S1  
Clinical biochemistry parameters.  
Females. Main allocation. Day 5. Mean  $\pm$  SD

Day : 5 Relative to Start Date

| Sex: Female |      | GLUC     | URE      | CRE            | CHOL     | TRIGL    | TP    | ALB   | GLOB  | BIL            | ALP                  | ALT   | AST                     | GGT   |
|-------------|------|----------|----------|----------------|----------|----------|-------|-------|-------|----------------|----------------------|-------|-------------------------|-------|
|             |      | (mmol/L) | (mmol/L) | ( $\mu$ mol/L) | (mmol/L) | (mmol/L) | (g/L) | (g/L) | (g/L) | ( $\mu$ mol/L) | (U/L)                | (U/L) | (IU/L)                  | (U/L) |
| Group: A    | Mean | 7.84     | 7.12     | 27.82          | 3.05     | 0.78     | 55.04 | 35.67 | 19.37 | 0.52           | 93.24 a <sup>1</sup> | 44.07 | 70.71 a <sup>1</sup>    | 0.00  |
|             | SD   | 0.57     | 0.82     | 1.39           | 0.37     | 0.12     | 0.65  | 2.18  | 2.04  | 0.23           | 16.49                | 6.84  | 4.52                    | 0.00  |
|             | N    | 5        | 5        | 5              | 5        | 5        | 5     | 5     | 5     | 5              | 5                    | 5     | 5                       | 5     |
| Group: B    | Mean | 7.08     | 6.90     | 28.64          | 3.18     | 0.86     | 55.80 | 35.39 | 20.41 | 0.81           | 86.67                | 54.64 | 105.37 d <sup>2</sup>   | 0.00  |
|             | SD   | 0.40     | 0.89     | 2.79           | 0.29     | 0.22     | 1.14  | 2.03  | 2.09  | 0.32           | 5.53                 | 10.29 | 23.74                   | 0.00  |
|             | N    | 5        | 5        | 5              | 5        | 5        | 5     | 5     | 5     | 5              | 5                    | 5     | 5                       | 5     |
| Group: C    | Mean | 7.22     | 6.20     | 27.57          | 2.83     | 0.69     | 55.66 | 36.08 | 19.58 | 0.94           | 73.38 d <sup>2</sup> | 50.43 | 92.48                   | 0.00  |
|             | SD   | 0.72     | 0.83     | 1.23           | 0.32     | 0.26     | 2.97  | 2.59  | 2.22  | 0.19           | 8.03                 | 6.39  | 13.60                   | 0.00  |
|             | N    | 5        | 5        | 5              | 5        | 5        | 5     | 5     | 5     | 5              | 5                    | 5     | 5                       | 5     |
| Group: D    | Mean | 6.77     | 7.08     | 27.58          | 2.90     | 0.72     | 55.22 | 34.32 | 20.89 | 0.96           | 80.71                | 57.27 | 116.10 d d <sup>3</sup> | 0.00  |
|             | SD   | 1.07     | 0.72     | 1.85           | 0.15     | 0.16     | 1.25  | 2.75  | 2.45  | 0.35           | 8.56                 | 6.63  | 28.68                   | 0.00  |
|             | N    | 5        | 5        | 5              | 5        | 5        | 5     | 5     | 5     | 5              | 5                    | 5     | 5                       | 5     |

1 [a - Group Factor Test: Analysis of Variance  $p < 0.05$ ]

2 [d - Test: Dunnett 2 Sided  $p < 0.05$ ]

3 [dd - Test: Dunnett 2 Sided  $p < 0.01$ ]

Group A, Vehicle. Group B: QN23, 2 mg/kg/day. Group C: QN23 6 mg/kg/day. Group D: QN23 18 mg/kg/day
